# Supplementary material
Source: publisher site journal article supplement (https://www.dovepress.com/article/484953)
Supplement: Supplementary file 1 [file get_supplementary_file.php]

**Supplementary Table 1. Characteristics of the study participants (n=30).**

|  | **Median [IQR] or n (%)** |
| --- | --- |
| **Age*, continuous* (years)** | 32.7 [28.5, 35.5] |
| Missing | 2 |
| **Race*, group*** |  |
| Non-white | 5 (16.7) |
| White | 24 (80.0) |
| Missing | 1 (3.3) |
| **Pre-pregnancy BMI*, continuous* (kg/m2)** | 24.4 [21.2, 27.4] |
| Missing | 1 |
| **Marriage status*, group*** |  |
| Currently married | 24 (80.0) |
| Never married | 6 (20.0) |
| **Education level*, group*** |  |
| High school or lower (≤12 years) | 8 (26.7) |
| Some college or college graduate (13-16 years) | 13 (43.3) |
| Above college (>16 years) | 9 (30.0) |

Abbreviations: IQR, interquartile range; BMI, body mass index.

**Supplementary Table 2. Correlations between the APAP biomarkers and self-reported use (n=30).**

|  | **Spearman correlation coefficient with reported days of APAP use in T1 (P-value)** | **Spearman correlation coefficient with reported days of APAP use in T3 (P-value)** |
| --- | --- | --- |
| **Maternal pregnancy urinary measures** |  |  |
| APAP | 0.25 (0.543) | 0.57 (0.350) |
| APAP-gluc | 0.30 (0.288) | 0.69 (0.187) |
| APAP-cys | 0.28 (0.168) | 0.66 (0.167) |
| **Cord serum measures** |  |  |
| APAP | 0.18 (0.052) | 0.73 (0.654) |
| APAP-gluc | 0.29 (0.064) | 0.61 (0.700) |
| APAP-cys | 0.34 (0.003) | 0.73 (0.105) |

Abbreviations: T1, first trimester; T3, third trimester; APAP, acetaminophen; APAP-gluc, acetaminophen glucuronide; APAP-cys, 3-(N-acetyl-l-cystein-S-yl)-acetaminophen.
